# Supplementary material for: Hydroxyethyl cellulose optimized cathode–electrolyte interfaces in aqueous zinc ion batteries
Source: Royal Society of Chemistry journal article supplement (doi:10.1039/d4ta04054f), 2024-01-01
Supplement: d4ta04054f1.pdf [file d4ta04054f1.pdf]

## Supplementary Information

### Hydroxyethyl cellulose optimized cathode/electrolyte interfaces in aqueous zinc ion batteries

*Sheng Lu<sup>a</sup>, Yuyang Gu<sup>b</sup>, Guangyu Cheng<sup>b</sup>, Yueni Mei<sup>b</sup>, Dongqing Wu<sup>\*,c</sup>, Yu Gao<sup>a</sup>,  
Xuemin Yu<sup>a</sup>, Liang Wu<sup>c</sup>, Yuezeng Su<sup>d</sup>, Han Wang<sup>\*,a</sup>*

*<sup>a</sup>School of Chemistry and Chemical Engineering, Shanghai University of Engineering  
Sciences, 333 Longteng Road, Shanghai, 201620 P. R. China. Email:*

*wanghan@sues.edu.cn*

*<sup>b</sup>State Key Laboratory of Space Power-Sources, Shanghai Institute of Space Power-  
Sources, 2965 Dongchuan RD, Shanghai, 200245, China.*

*<sup>c</sup>School of Chemistry and Chemical Engineering, Shanghai Jiao Tong University, 800  
Dongchuan Road, Shanghai, 200240 P. R. China. Email: wudongqing@sjtu.edu.cn*

*<sup>d</sup>School of Electronic Information and Electrical Engineering, Shanghai Jiao Tong  
University, 800 Dongchuan Road, Shanghai, 200240 P. R. China.*

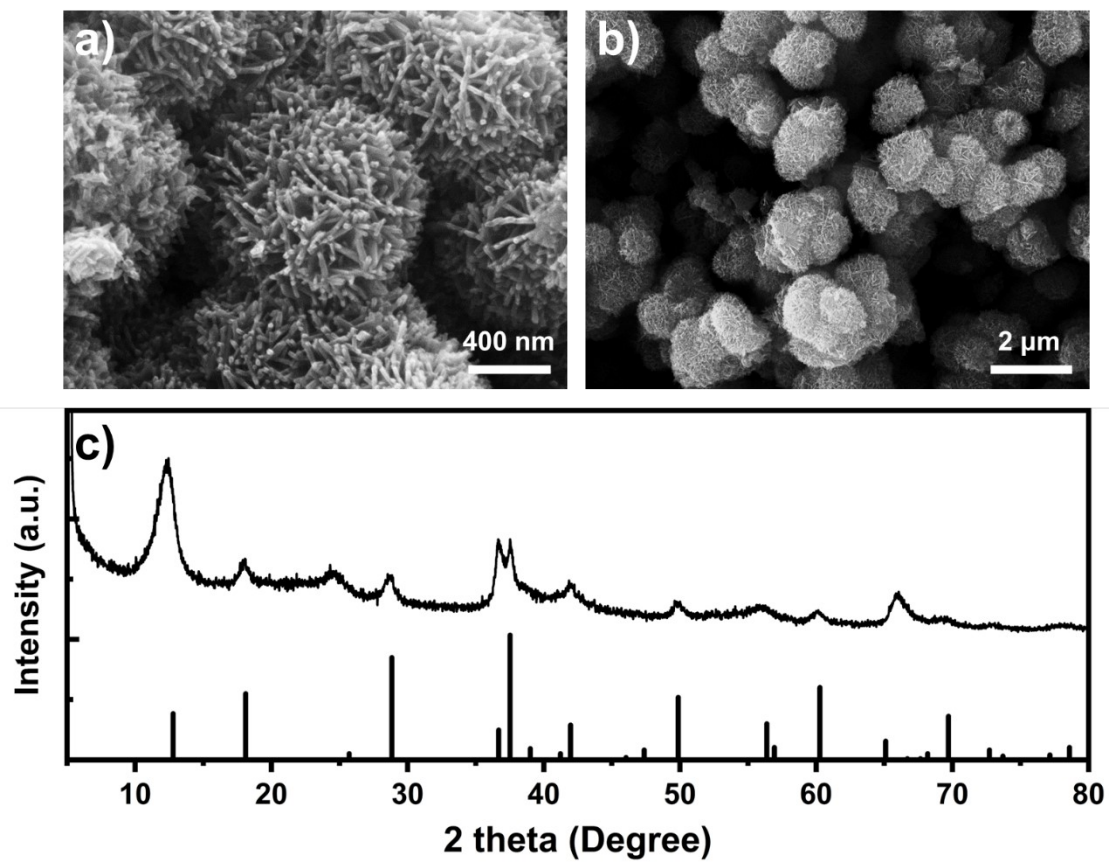

**Figure S1** (a-b) SEM images of MnO<sub>2</sub> in different scales. (c) XRD patterns of MnO<sub>2</sub>.

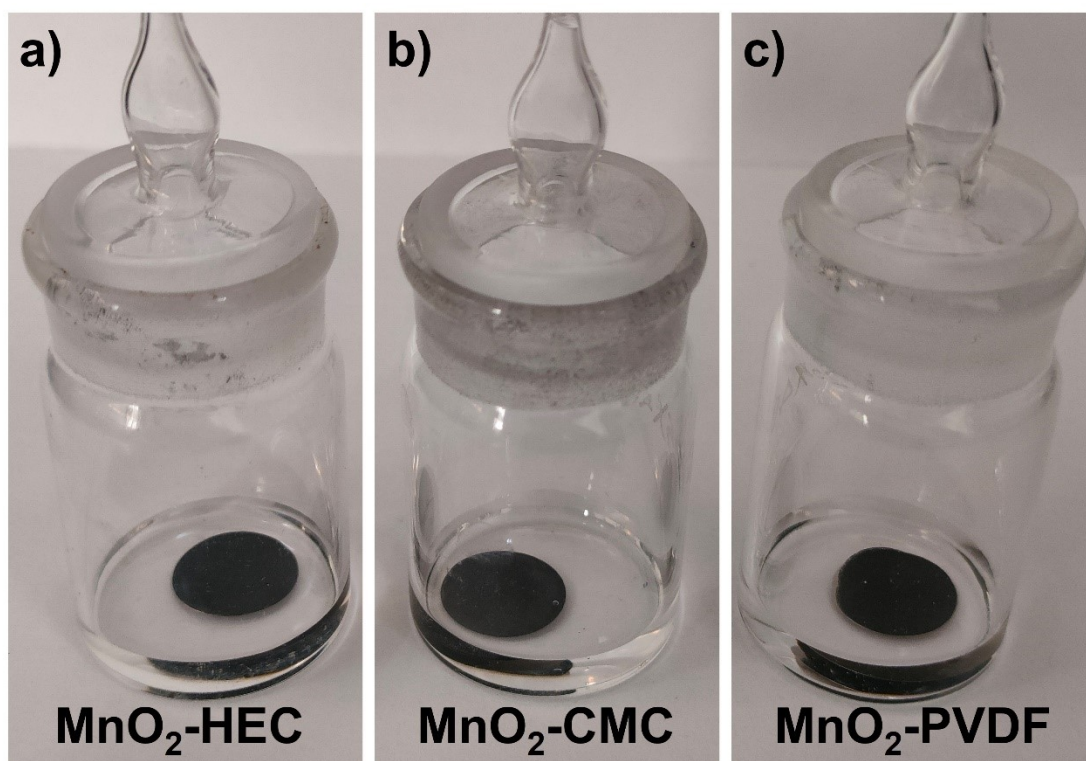

**Figure S2** Digital photos of (a) MnO<sub>2</sub>-HEC, (b) MnO<sub>2</sub>-CMC, and (c) MnO<sub>2</sub>-PVDF immersed in the aqueous electrolyte for a week.

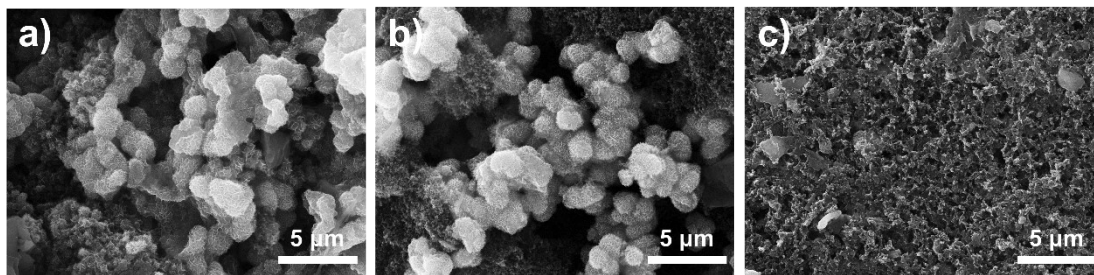

**Figure S3** SEM images of (a) MnO<sub>2</sub>-HEC, (b) MnO<sub>2</sub>-CMC and (c) MnO<sub>2</sub>-PVDF

**Table S1.** Fitting data of Nyquist plots in Figure 2a.

|                                                   | MnO <sub>2</sub> -HEC | MnO <sub>2</sub> -CMC | MnO <sub>2</sub> -PVDF |
|---------------------------------------------------|-----------------------|-----------------------|------------------------|
| R <sub>s</sub> (Ω)                                | 1.41                  | 1.64                  | 1.83                   |
| CPE (S·sec <sup>n</sup> ·cm <sup>-2</sup> )       | 0.00444               | 0.00671               | 0.00399                |
| Freq power, n                                     | 0.71                  | 0.90                  | 0.97                   |
| R <sub>ct</sub> (Ω)                               | 133.50                | 141.00                | 1604.00                |
| CPE (S·sec <sup>n</sup> ·cm <sup>-2</sup> )       | 0.00032               | 0.00064               | 0.00059                |
| Freq power, n                                     | 0.75                  | 0.63                  | 0.67                   |
| Warburg (S·sec <sup>0.5</sup> ·cm <sup>-2</sup> ) | 0.00370               | 0.00133               | 0.00336                |

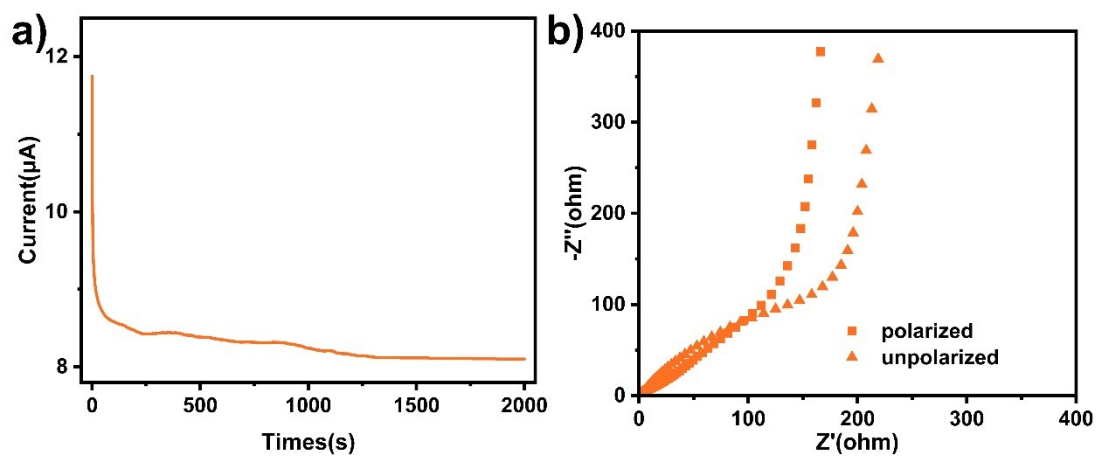

**Figure S4** (a) Current-time plot of a Zn||MnO<sub>2</sub>-HEC cell after the application of a constant potential (50 mV). (b) corresponding EIS data before and after polarization.

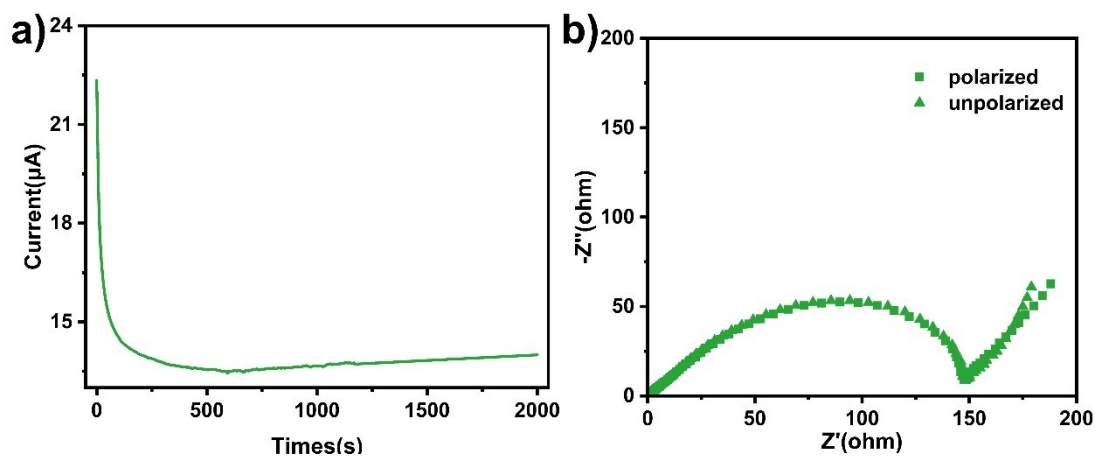

**Figure S5** (a) Current-time plot of a Zn||MnO<sub>2</sub>-CMC cell after the application of a constant potential (50 mV). (b) corresponding EIS data before and after polarization.

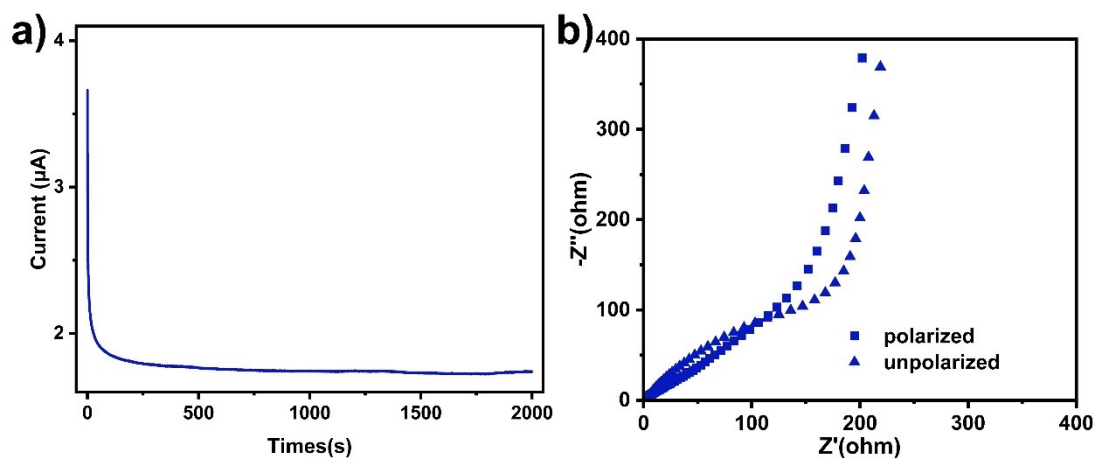

**Figure S6** (a) Current-time plot of a Zn||MnO<sub>2</sub>-PVDF cell after the application of a constant potential (50 mV). (b) corresponding EIS data before and after polarization.



**Table S2** Specific parameters used to calculate  $t_{M^+}$ 

| Sample                 | $I_{in}$ (A) | $I_s$ (A)   | $R_{in}$ ( $\Omega$ ) | $R_s$ ( $\Omega$ ) | $\Delta v$ (V vs. $Zn^{2+}/Zn$ ) |
|------------------------|--------------|-------------|-----------------------|--------------------|----------------------------------|
| MnO <sub>2</sub> -PVDF | 0.000003663  | 0.000001739 | 247.2                 | 225.4              | 0.05                             |
| MnO <sub>2</sub> -HEC  | 0.000011750  | 0.000008283 | 247.2                 | 219.6              | 0.05                             |
| MnO <sub>2</sub> -CMC  | 0.000022610  | 0.000014540 | 151.0                 | 163.0              | 0.05                             |

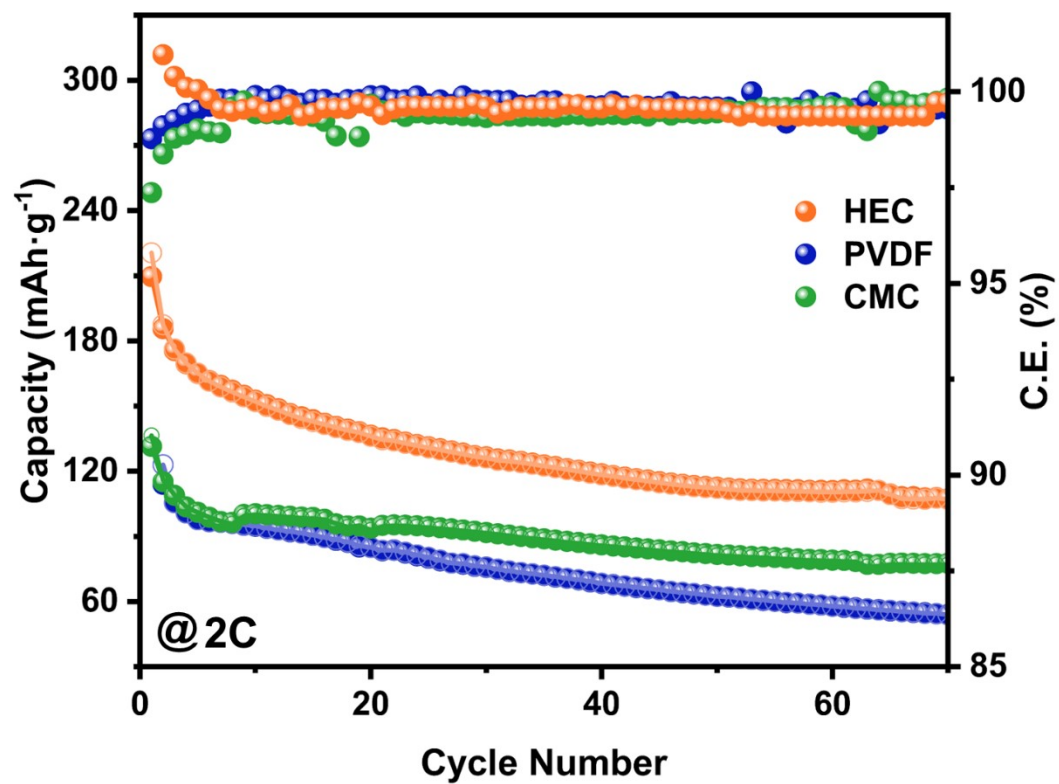

**Figure S7** The cycling performances of the MnO<sub>2</sub>-HEC, MnO<sub>2</sub>-CMC and MnO<sub>2</sub>-PVDF cells at 2C.

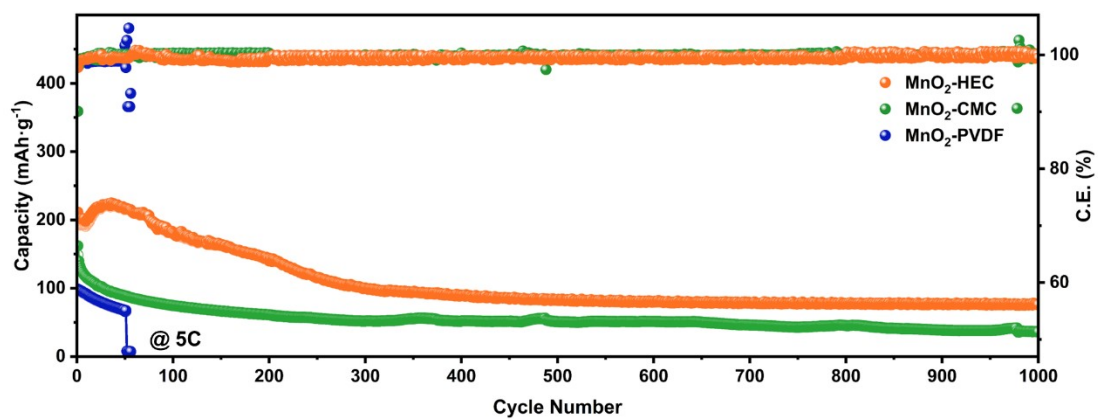

**Figure S8** The cycling performances of the MnO<sub>2</sub>-HEC, MnO<sub>2</sub>-CMC and MnO<sub>2</sub>-PVDF cells at 5C.

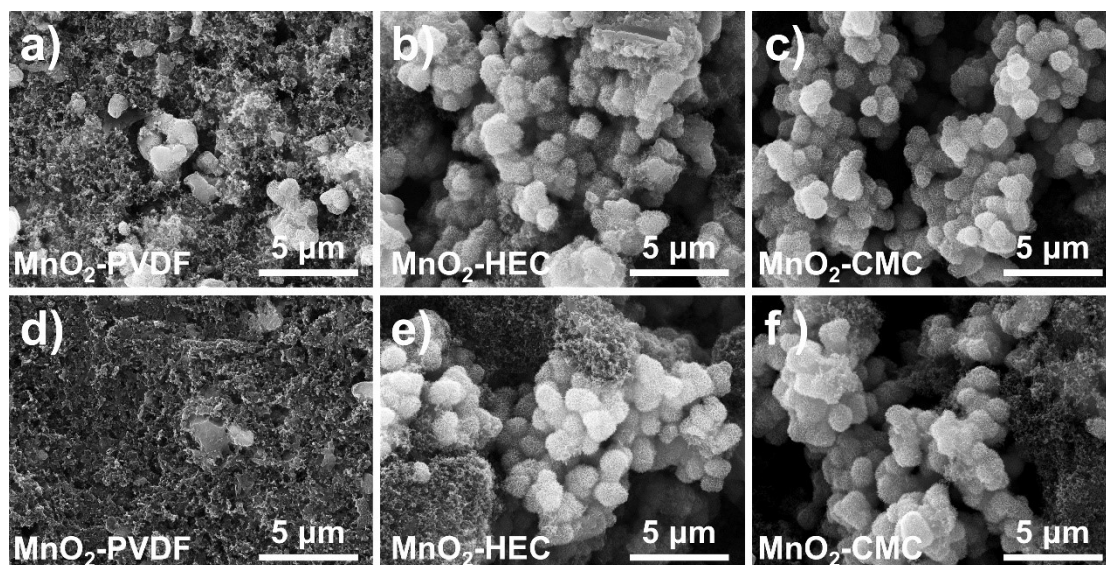

**Figure S9** The SEM images of the cathodes with PVDF (a), HEC (b), CMC (c) as binders before cycling test. The SEM images of the cathodes with PVDF (d), HEC (e), CMC (f) as binders after 5 cycles at 5C.

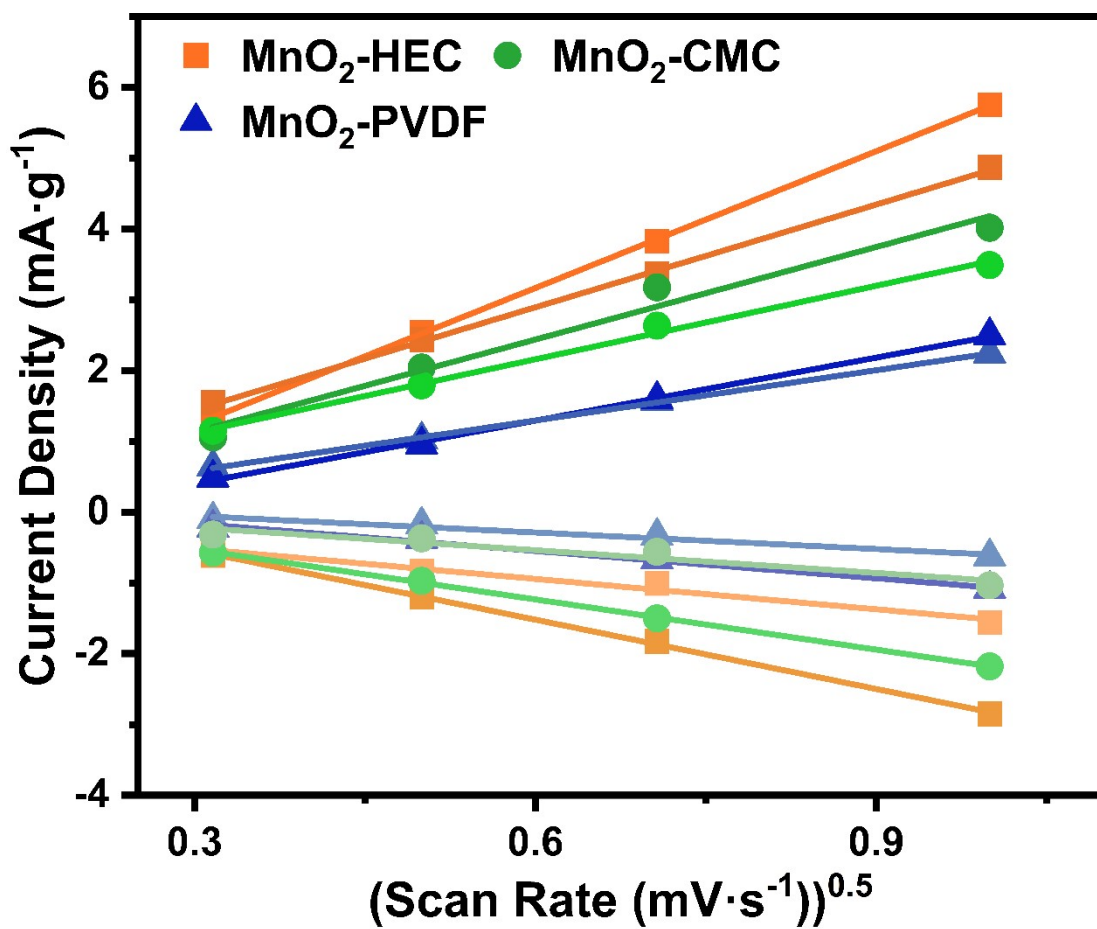

Figure S10 The calculated  $D_{Zn^{2+}}$  of each peak for MnO<sub>2</sub>-HEC, MnO<sub>2</sub>-CMC, and MnO<sub>2</sub>-PVDF.

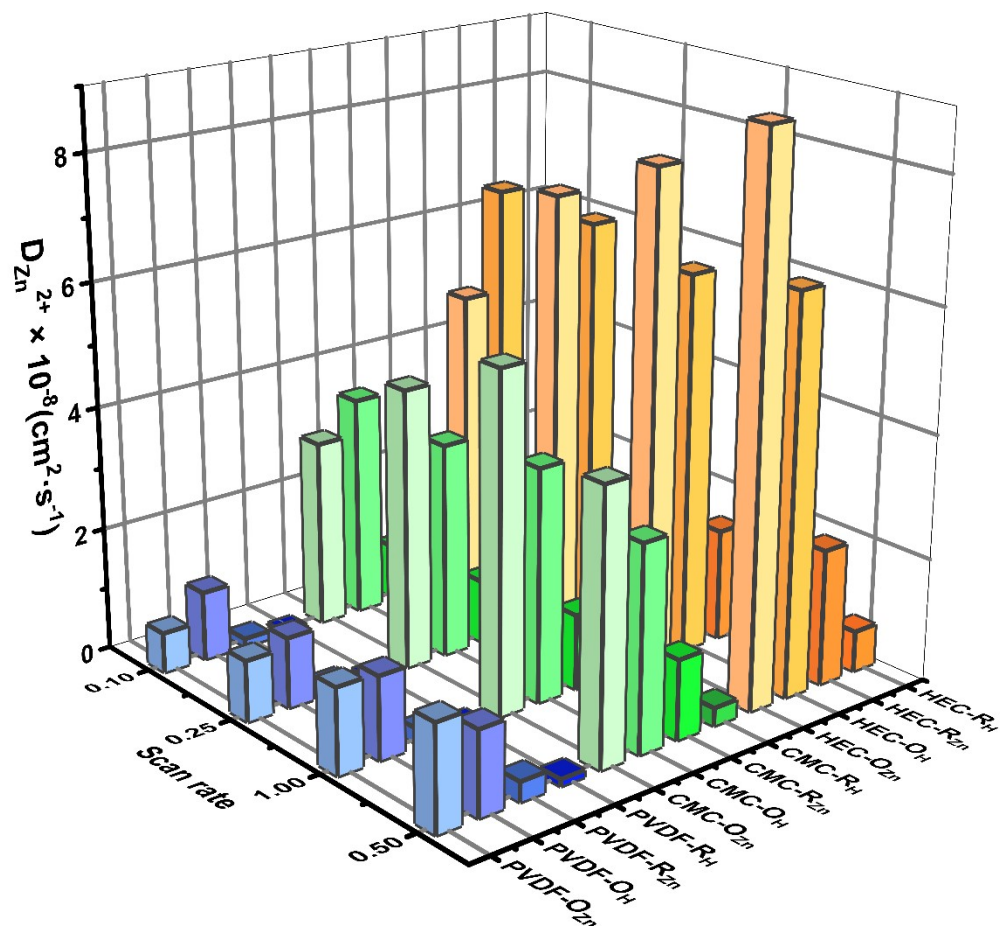

**Figure S11** Diffusion coefficient of the MnO<sub>2</sub>-HEC, MnO<sub>2</sub>-CMC, and MnO<sub>2</sub>-PVDF cells.

**Table S3.** Detailed data on the diffusion coefficient of the MnO<sub>2</sub>-HEC, MnO<sub>2</sub>-CMC, and MnO<sub>2</sub>-PVDF cells.

| Scan rate <sup>b)</sup> | MnO <sub>2</sub> -HEC <sup>a)</sup> |                |                 |                | MnO <sub>2</sub> -CMC <sup>a)</sup> |                |                 |                | MnO <sub>2</sub> -PVDF <sup>a)</sup> |                |                 |                |
|-------------------------|-------------------------------------|----------------|-----------------|----------------|-------------------------------------|----------------|-----------------|----------------|--------------------------------------|----------------|-----------------|----------------|
|                         | O <sub>Zn</sub>                     | O <sub>H</sub> | R <sub>Zn</sub> | R <sub>H</sub> | O <sub>Zn</sub>                     | O <sub>H</sub> | R <sub>Zn</sub> | R <sub>H</sub> | O <sub>Zn</sub>                      | O <sub>H</sub> | R <sub>Zn</sub> | R <sub>H</sub> |
| 0.10                    | 4.86                                | 6.52           | 1.01            | 0.83           | 3.04                                | 3.60           | 0.89            | 0.27           | 0.65                                 | 1.12           | 0.13            | 0.03           |
| 0.25                    | 7.04                                | 6.46           | 1.54            | 0.75           | 4.54                                | 3.48           | 1.03            | 0.15           | 0.99                                 | 1.14           | 0.15            | 0.03           |
| 0.50                    | 7.95                                | 6.16           | 1.81            | 0.55           | 5.48                                | 3.77           | 1.22            | 0.17           | 1.39                                 | 1.34           | 0.24            | 0.06           |
| 1.00                    | 8.99                                | 6.44           | 2.20            | 0.66           | 4.38                                | 3.31           | 1.29            | 0.29           | 1.70                                 | 1.36           | 0.32            | 0.11           |

<sup>a)</sup> The unit of diffusion coefficient is (cm<sup>2</sup>·S<sup>-1</sup>·10<sup>-8</sup>). <sup>b)</sup> The unit of scan rate is mV·s<sup>-1</sup>

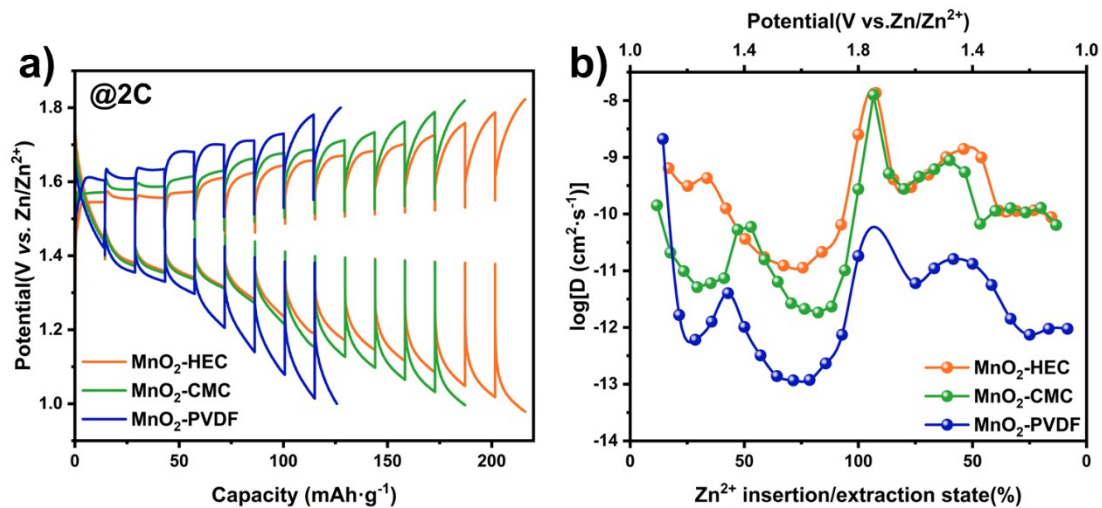

**Figure S12** a) The GITT curves of the MnO<sub>2</sub>-HEC, MnO<sub>2</sub>-CMC, and MnO<sub>2</sub>-PVDF cells at 2 C. b) Corresponding diffusion coefficients (*D*) of the cells.



**Table S4.** The performance comparison of the MnO<sub>2</sub>-HEC cell with those of the previously reported MnO<sub>2</sub>-based AZIBs.

| The types of binder | Energy Density (Wh·kg <sup>-1</sup> ) | Power Density (W·kg <sup>-1</sup> ) | Ref. |
|---------------------|---------------------------------------|-------------------------------------|------|
| SA                  | 370                                   | 555                                 | 1    |
| PAN                 | 279                                   | 72                                  | 2    |
|                     | 270                                   | 108                                 |      |
|                     | 252                                   | 288                                 |      |
|                     | 198                                   | 576                                 |      |
|                     | 135                                   | 1152                                |      |
| CMC                 | 365.75                                | 87.5                                | 3    |
|                     | 218.75                                | 175                                 |      |
|                     | 192.5                                 | 350                                 |      |
|                     | 140                                   | 700                                 |      |
|                     | 105                                   | 1400                                |      |
| CMC                 | 194.4                                 | 2700                                | 4    |
|                     | 518.4                                 | 180                                 |      |
| SA                  | 234                                   | 54                                  | 5    |
|                     | 225                                   | 108                                 |      |
|                     | 180                                   | 162                                 |      |
|                     | 135                                   | 216                                 |      |
|                     | 99                                    | 270                                 |      |
|                     | 54                                    | 540                                 |      |
|                     | 36                                    | 1080                                |      |
| PEDOT:PSS           | 570                                   | 380                                 | 6    |
|                     | 235.6                                 | 1900                                |      |
|                     | 161.5                                 | 2850                                |      |
| β-PVDF              | 512.45                                | 185                                 | 7    |
|                     | 351.5                                 | 555                                 |      |
|                     | 286.75                                | 925                                 |      |
|                     | 222                                   | 1850                                |      |
|                     | 166.5                                 | 3700                                |      |
|                     | 111                                   | 5550                                |      |
| PAA                 | 342                                   | 190                                 | 8    |
|                     | 298.3                                 | 380                                 |      |
|                     | 281.2                                 | 570                                 |      |
|                     | 273.6                                 | 760                                 |      |
|                     | 231.8                                 | 1520                                |      |
|                     | 209                                   | 2280                                |      |
|                     | 163.4                                 | 4560                                |      |
|                     | 123.5                                 | 9120                                |      |

---

|     |        |      |           |
|-----|--------|------|-----------|
|     | 618.66 | 108  |           |
|     | 487.62 | 270  |           |
| HEC | 398.7  | 540  | This Work |
|     | 332.1  | 1080 |           |
|     | 222.3  | 2700 |           |

---

## References

1. D. Xie, J. Zhao, Q. Jiang, H. Wang, H. Huang, P. Rao and J. Mao, *ChemPhysChem*, 2022, **23**, e202200106.
2. O. Fitz, S. Ingenhoven, C. Bischoff, H. Gentischer, K. P. Birke, D. Saracsan and D. Biro, *Batteries*, 2021, **7**, 40.
3. N. Jaikrajang, W. Kao-Ian, T. Muramatsu, R. Chanajaree, T. Yonezawa, Z. Y. Al Balushi, S. Kheawhom and R. Cheacharoen, *Acs Applied Energy Materials*, 2021, **4**, 7138-7147.
4. H. J. Chang, I. A. Rodríguez-Pérez, M. Fayette, N. L. Canfield, H. Pan, D. Choi, X. Li and D. Reed, *Carbon Energy*, 2021, **3**, 473-481.
5. A. Salsabila, E. Prajatelista, D. Y. Putro, A. N. Fahri, M. H. Alfaruqi and J. Kim, *J. Phys. Chem. Solids*, 2024, **188**, 111880.
6. S. Sarma Choudhury, N. Katiyar, R. Saha and S. Bhattacharya, *Sci. Rep.*, 2024, **14**, 1597.
7. Y. Li, X. Cui, J. Yan, Y. Zhang, E. Xie and J. Fu, *J. Colloid Interface Sci.*, 2023, **650**, 1605-1611.
8. V. Soundharrajan, B. Sambandam, S. Kim, S. Islam, J. Jo, S. Kim, V. Mathew, Y.-k. Sun and J. Kim, *Energy Storage Mater.*, 2020, **28**, 407-417.
